# Supplementary material
Source: Research Square preprint supplement (doi:10.21203/rs.3.rs-8981993/v1)
Supplement: Supplementary file 1 [file 674383c36c420a0792422e9d.docx]

**Table S1:** HARP deployments and their latitude, longitude, depth, start of recording effort, and end of recording effort. Deployments with a duty cycle have an asterisk (*). Deployments ALEUT03-BD and CINMS10-C recorded 5 minutes for every 10 minutes. Deployment GofAK_CB02 recorded 10 minutes for every 12 minutes.

| **Deployment** | **Latitude** | **Longitude** | **Depth (m)** | **Start Effort** | **End Effort** |
| --- | --- | --- | --- | --- | --- |
| ALEUT01-KS | 52.316 N | 178.520 E | 1092 | 6/3/2010 0:00 | 7/20/2010 11:15 |
| ALEUT02-BD | 52.633 N | 175.633 E | 783 | 8/27/2010 0:00 | 5/26/2011 8:05 |
| ALEUT03-BD* | 52.076 N | 175.639 E | 777 | 5/31/2011 0:00 | 8/26/2012 19:51 |
| CINMS09-C | 34.315 N | 120.806 W | 799 | 9/3/2009 0:00 | 10/27/2009 6:17 |
| CINMS10-C* | 34.318 N | 120.807 W | 780 | 11/4/2009 0:00 | 2/20/2010 12:32 |
| CINMS13-C | 34.316 N | 120.806 W | 915 | 6/24/2010 23:00 | 9/21/2010 3:43 |
| CINMS15-C | 34.316 N | 120.806 W | 850 | 11/16/2010 0:00 | 3/2/2011 3:30 |
| CINMS16-C | 34.316 N | 120.805 W | 850 | 4/5/2011 21:00 | 7/11/2011 23:12 |
| CINMS17-C | 34.316 N | 120.805 W | 825 | 10/27/2011 0:00 | 3/3/2012 12:28 |
| CINMS18-C | 34.325 N | 120.806 W | 758 | 3/25/2012 0:00 | 8/2/2012 17:20 |
| CINMS19-C | 34.323 N | 120.806 W | 800 | 8/2/2012 0:00 | 12/7/2012 20:19 |
| CINMS20-C | 34.317 N | 120.805 W | 800 | 12/18/2012 0:00 | 4/28/2013 15:16 |
| CINMS21-C | 34.316 N | 120.805 W | 814 | 5/2/2013 20:00 | 6/17/2013 10:54 |
| CINMS22-C | 34.316 N | 120.805 W | 823 | 9/22/2013 0:00 | 1/14/2014 19:35 |
| CINMS23-C | 34.316 N | 120.804 W | 828 | 1/14/2014 21:00 | 4/9/2014 17:41 |
| CINMS24-C | 34.324 N | 120.806 W | 754 | 4/9/2014 20:00 | 7/29/2014 7:22 |
| CINMS25-C | 34.324 N | 120.806 W | 770 | 7/29/2014 12:00 | 11/4/2014 9:38 |
| CINMS26-C | 34.324 N | 120.807 W | 600 | 11/4/2014 14:00 | 2/5/2015 14:53 |
| CINMS27-C | 34.326 N | 120.806 W | 755 | 2/6/2015 0:00 | 6/10/2015 22:17 |
| CINMS28-C | 34.326 N | 120.806 W | 754 | 6/11/2015 0:00 | 10/4/2015 21:06 |
| CINMS_C_29 | 34.325 N | -120.806 W | NULL | 10/5/2015 0:00 | 12/18/2015 2:35 |
| CINMS_C_30 | 34.323 N | 120.806 W | 755 | 3/17/2016 0:00 | 7/27/2016 20:21 |
| CINMS_C_31 | 34.324 N | 120.806 W | 756 | 7/28/2016 0:00 | 11/9/2016 21:19 |
| CINMS_C_32 | 34.324 N | 120.807 W | 760 | 11/10/2016 0:00 | 2/22/2017 8:36 |
| CINMS_C_33 | 34.324 N | 120.805 W | 755 | 2/22/2017 18:00 | 6/8/2017 2:26 |
| CINMS_C_36 | 34.324 N | 120.806 W | 758 | 2/17/2018 0:00 | 6/29/2018 18:54 |
| CINMS_C_37 | 34.322 N | 120.809 W | 766 | 7/12/2018 0:00 | 12/1/2018 13:22 |
| CINMS_C_38 | 34.322 N | 120.809 W | 765 | 1/24/2019 0:00 | 4/12/2019 19:31 |
| CINMS_C_39 | 34.323 N | 120.808 W | 765 | 4/16/2019 0:00 | 9/5/2019 20:51 |
| CINMS_C_40 | 34.320 N | 120.805 W | 762 | 9/20/2019 20:00 | 1/3/2020 17:41 |
| CINMS_C_44 | 34.316 N | 120.800 W | 759 | 6/19/2021 0:00 | 9/5/2021 13:35 |
| GofAK_CB01 | 58.645 N | 148.068 W | 1000 | 7/13/2011 0:00 | 2/19/2012 20:57 |
| GofAK_CB02* | 58.671 N | 148.020 W | 900 | 5/3/2012 0:00 | 2/12/2013 23:38 |
| GofAK_CB03 | 58.673 N | 148.009 W | 877 | 6/6/2013 0:00 | 9/5/2013 2:05 |
| GofAK_CB04 | 58.671 N | 148.021 W | 858 | 9/5/2013 7:00 | 4/28/2014 23:03 |
| GofAK_CB05 | 58.670 N | 148.023 W | 914 | 4/29/2014 0:00 | 9/9/2014 6:18 |
| GofAK_CB06 | 58.670 N | 148.024 W | 900 | 9/9/2014 12:00 | 5/2/2015 1:21 |
| GofAK_CB_07_01 | 58.655 N | 148.091 W | 931 | 5/1/2015 3:30 | 9/6/2015 7:50 |
| GofAK_CB_08 | 58.669 N | 148.025 W | 874 | 4/30/2017 12:00 | 9/12/2017 12:06 |
| GofAK_CB_09 | 58.670 N | 148.027 W | 900 | 9/14/2017 12:00 | 6/16/2018 14:53 |
| GofAK_CB_10 | 58.669 N | 148.026 W | 972 | 4/25/2019 8:00 | 9/27/2019 3:27 |
| GofAK_CB_11 | 58.669 N | 148.029 W | 970 | 9/27/2019 12:00 | 8/1/2020 7:01 |
| GofAK_KOA_01 | 57.224 N | 150.528 W | 1000 | 4/24/2019 19:00 | 9/27/2019 19:06 |
| GofAK_PT01 | 56.243 N | 142.757 W | 989 | 9/9/2012 0:00 | 6/10/2013 15:05 |
| GofAK_PT02 | 56.243 N | 142.757 W | 987 | 6/11/2013 2:00 | 8/20/2013 2:30 |
| GofAK_PT03 | 56.242 N | 142.756 W | 988 | 9/3/2013 5:00 | 3/21/2014 3:53 |
| GofAK_PT04 | 56.243 N | 142.757 W | 998 | 4/30/2014 0:00 | 9/10/2014 20:30 |
| GofAK_QN01 | 56.339 N | 145.186 W | 930 | 6/10/2013 8:00 | 9/11/2013 15:49 |
| GofAK_QN02 | 56.339 N | 145.187 W | 930 | 9/11/2013 21:00 | 4/16/2014 23:50 |
| GofAK_QN04 | 56.341 N | 145.183 W | 900 | 9/10/2014 18:00 | 5/2/2015 18:41 |
| GofAK_QN05 | 56.340 N | 145.185 W | 945 | 5/2/2015 6:00 | 8/18/2015 18:16 |
| GofAK_QN_06 | 56.339 N | 145.185 W | 964 | 4/30/2017 0:00 | 9/14/2017 20:38 |
| OCNMS12-QC | 47.500 N | 125.353 W | 650 | 1/27/2011 6:00 | 10/7/2011 7:23 |
| OCNMS13-CE | 47.351 N | 124.720 W | 118 | 5/21/2011 0:00 | 11/6/2011 10:12 |
| OCNMS14-QC | 47.500 N | 125.353 W | 1394 | 12/7/2011 6:00 | 7/11/2012 7:00 |
| OCNMS15-QC | 47.500 N | 125.353 W | 1394 | 9/14/2012 0:00 | 6/30/2013 9:22 |
| OCNMS16-QC | 47.500 N | 125.354 W | 1384 | 7/17/2013 0:00 | 5/2/2014 9:32 |



**Figure S1:** Click detection comparison over deployment CINMS_C_33. Presence shown as the number of click-positive one-minute bins per week. Top figure shows results of detector described in Frasier et al. (2017) and bottom figure shows results of detector described in Soldevilla et al. (2008) and Roch et al. (2011).


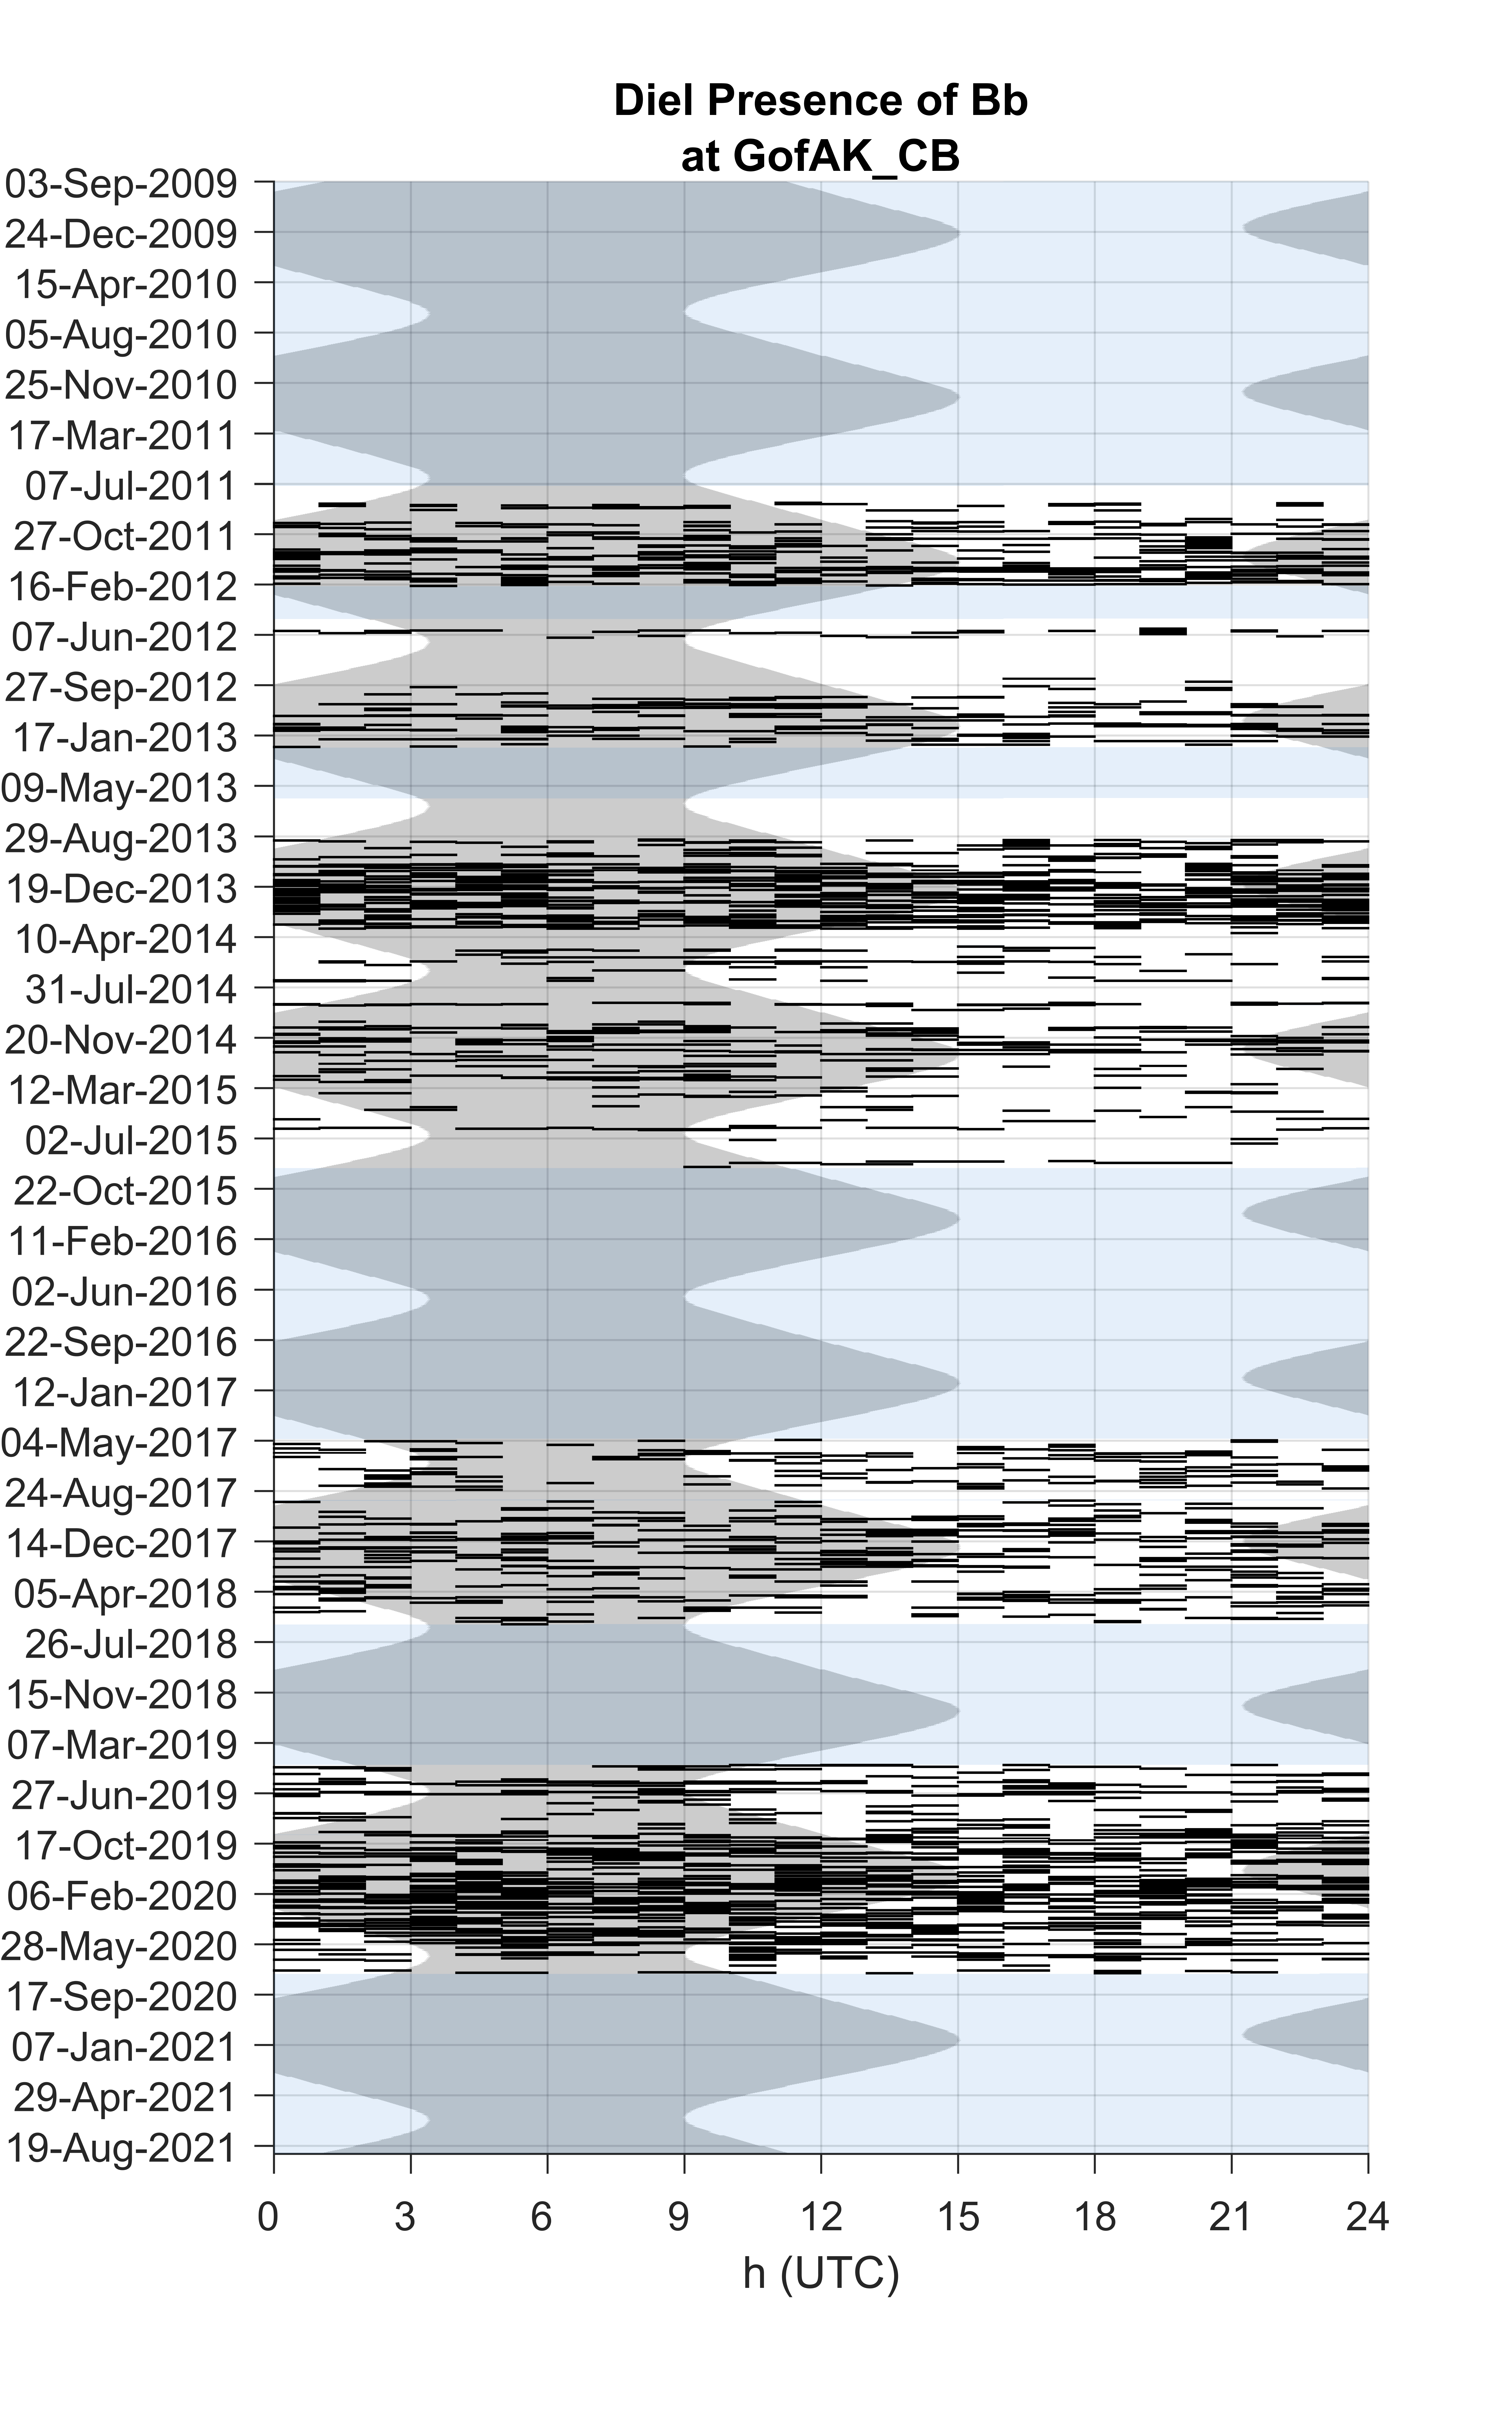


**Figure S2:** Baird’s beaked whale diel presence at GofAK_CB. Hours with acoustic presence (black lines) were plotted for each day with recording effort and are shown over 24 hours (in UTC). Gray areas indicate nighttime periods and white areas indicate daytime periods. Blue shading indicates periods with no recording effort.


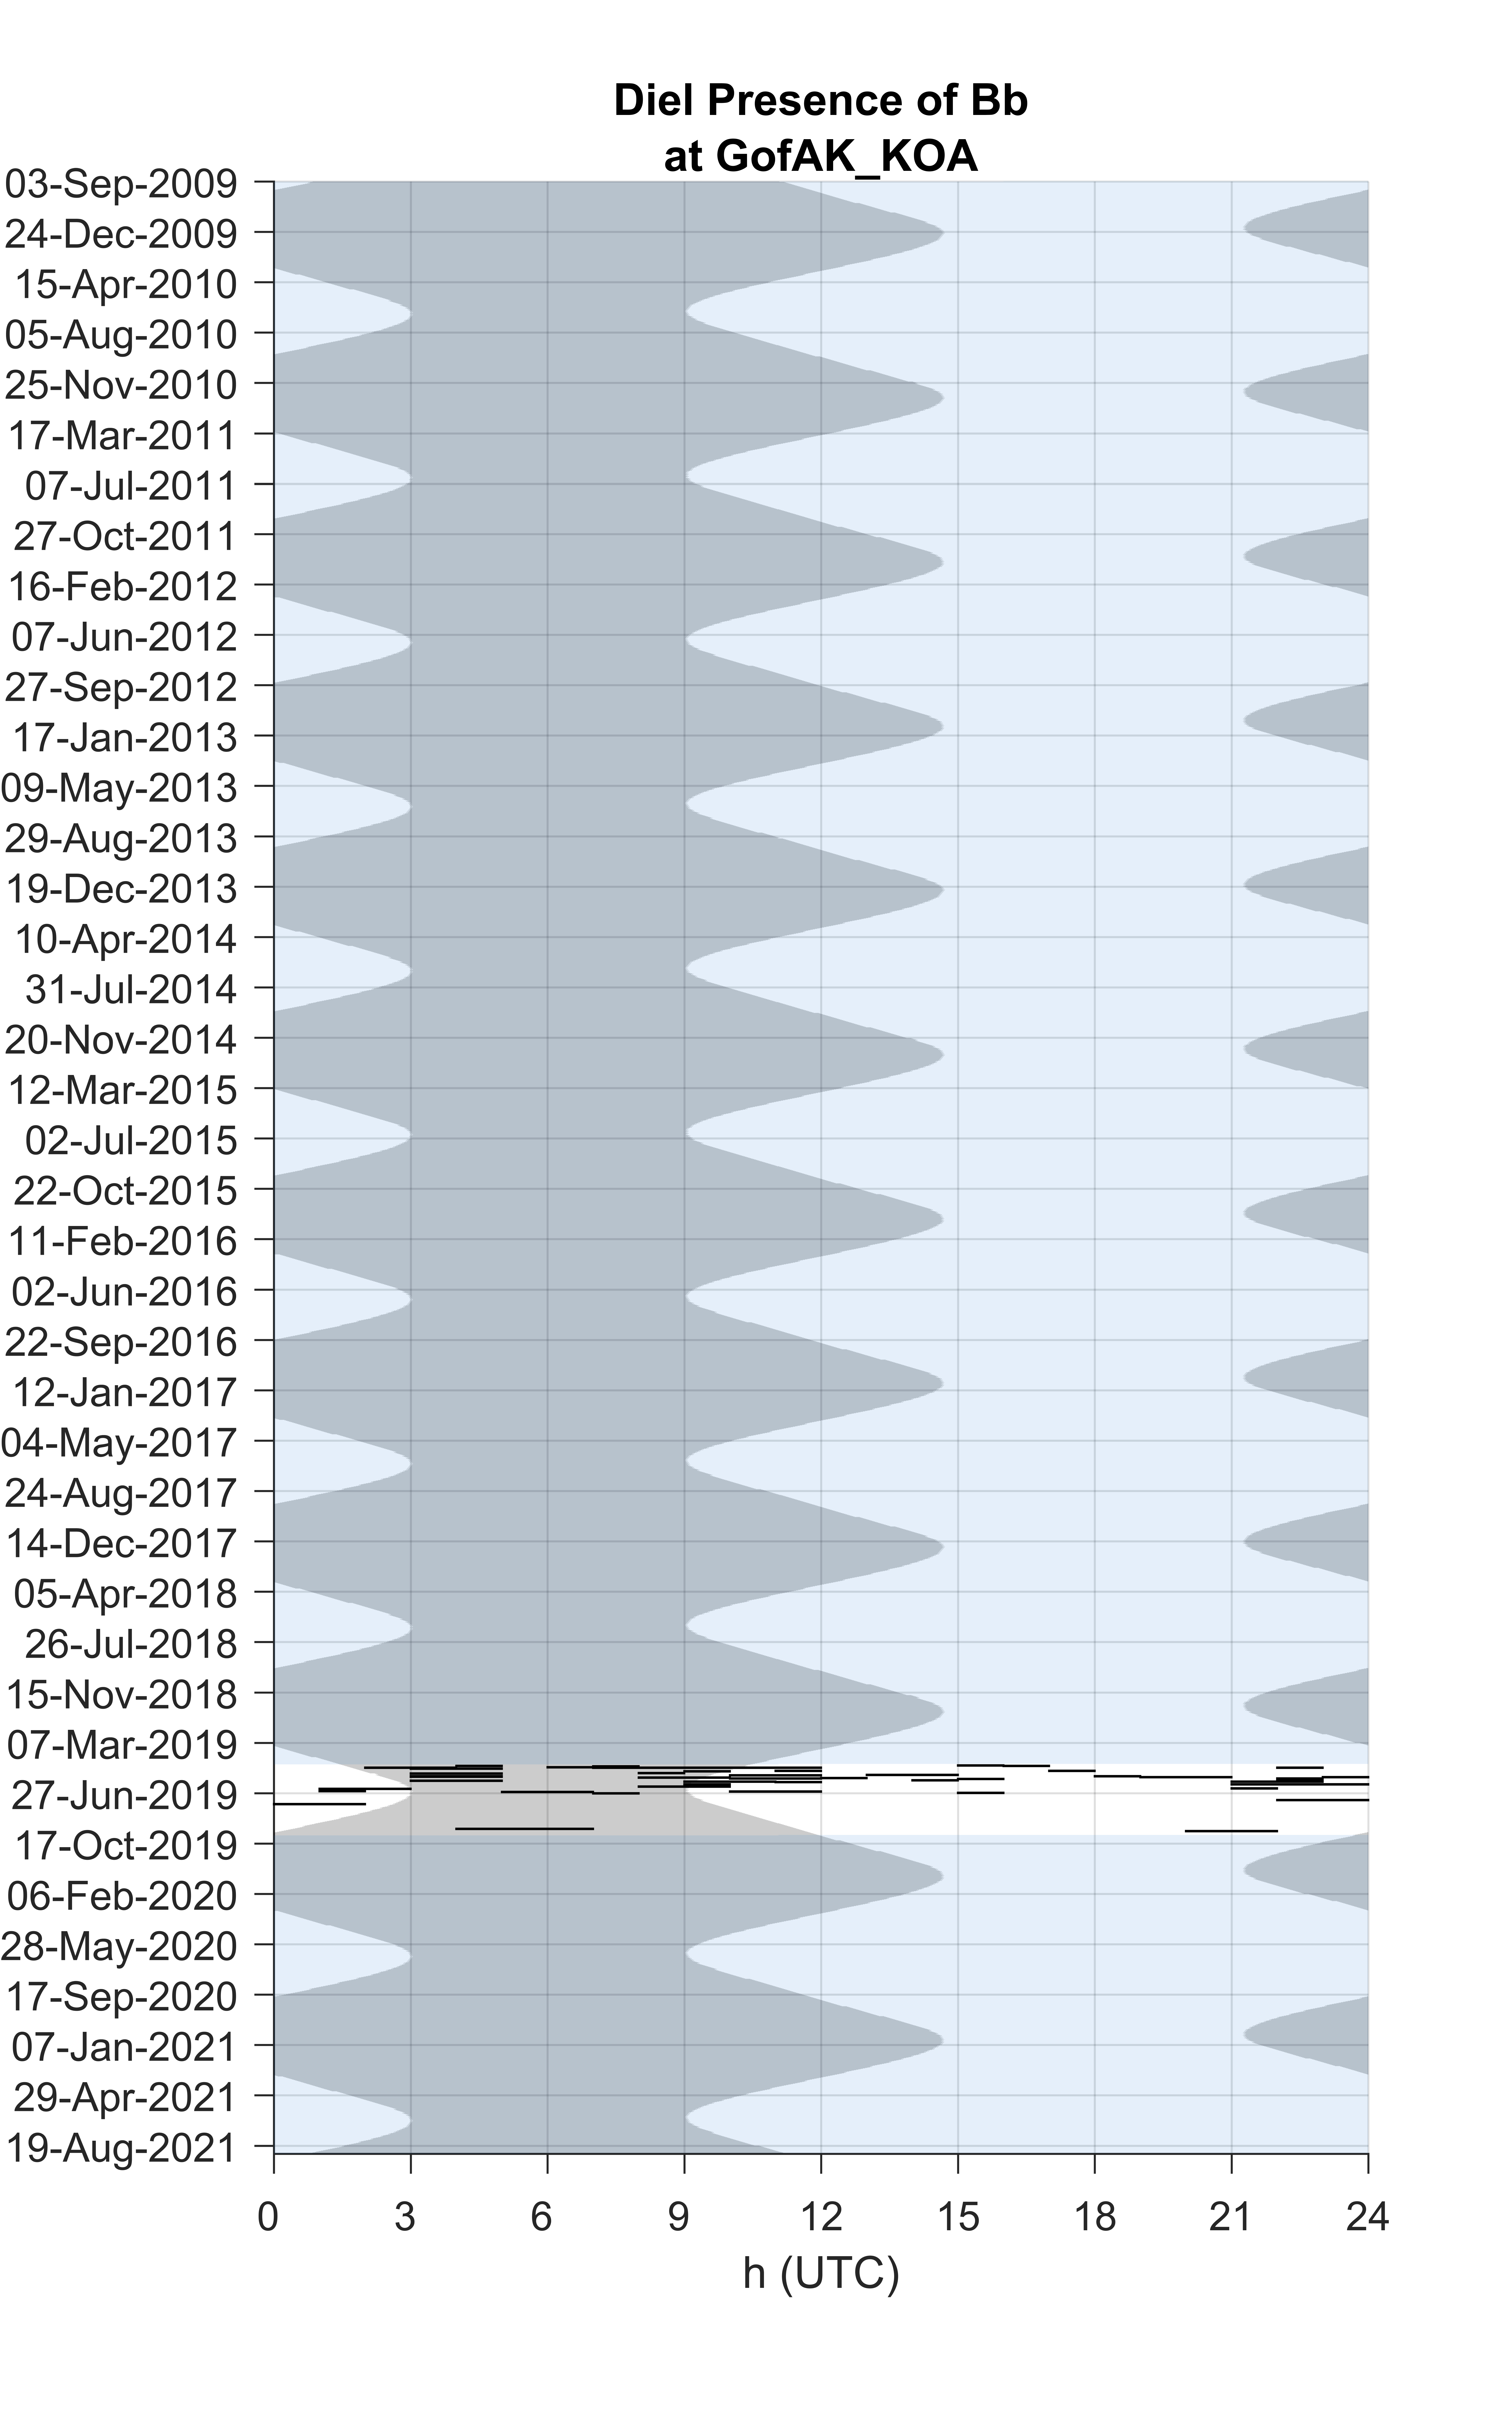


**Figure S3:** Baird’s beaked whale diel presence at GofAK_KOA. Hours with acoustic presence (black lines) were plotted for each day with recording effort and are shown over 24 hours (in UTC). Gray areas indicate nighttime periods and white areas indicate daytime periods. Blue shading indicates periods with no recording effort.


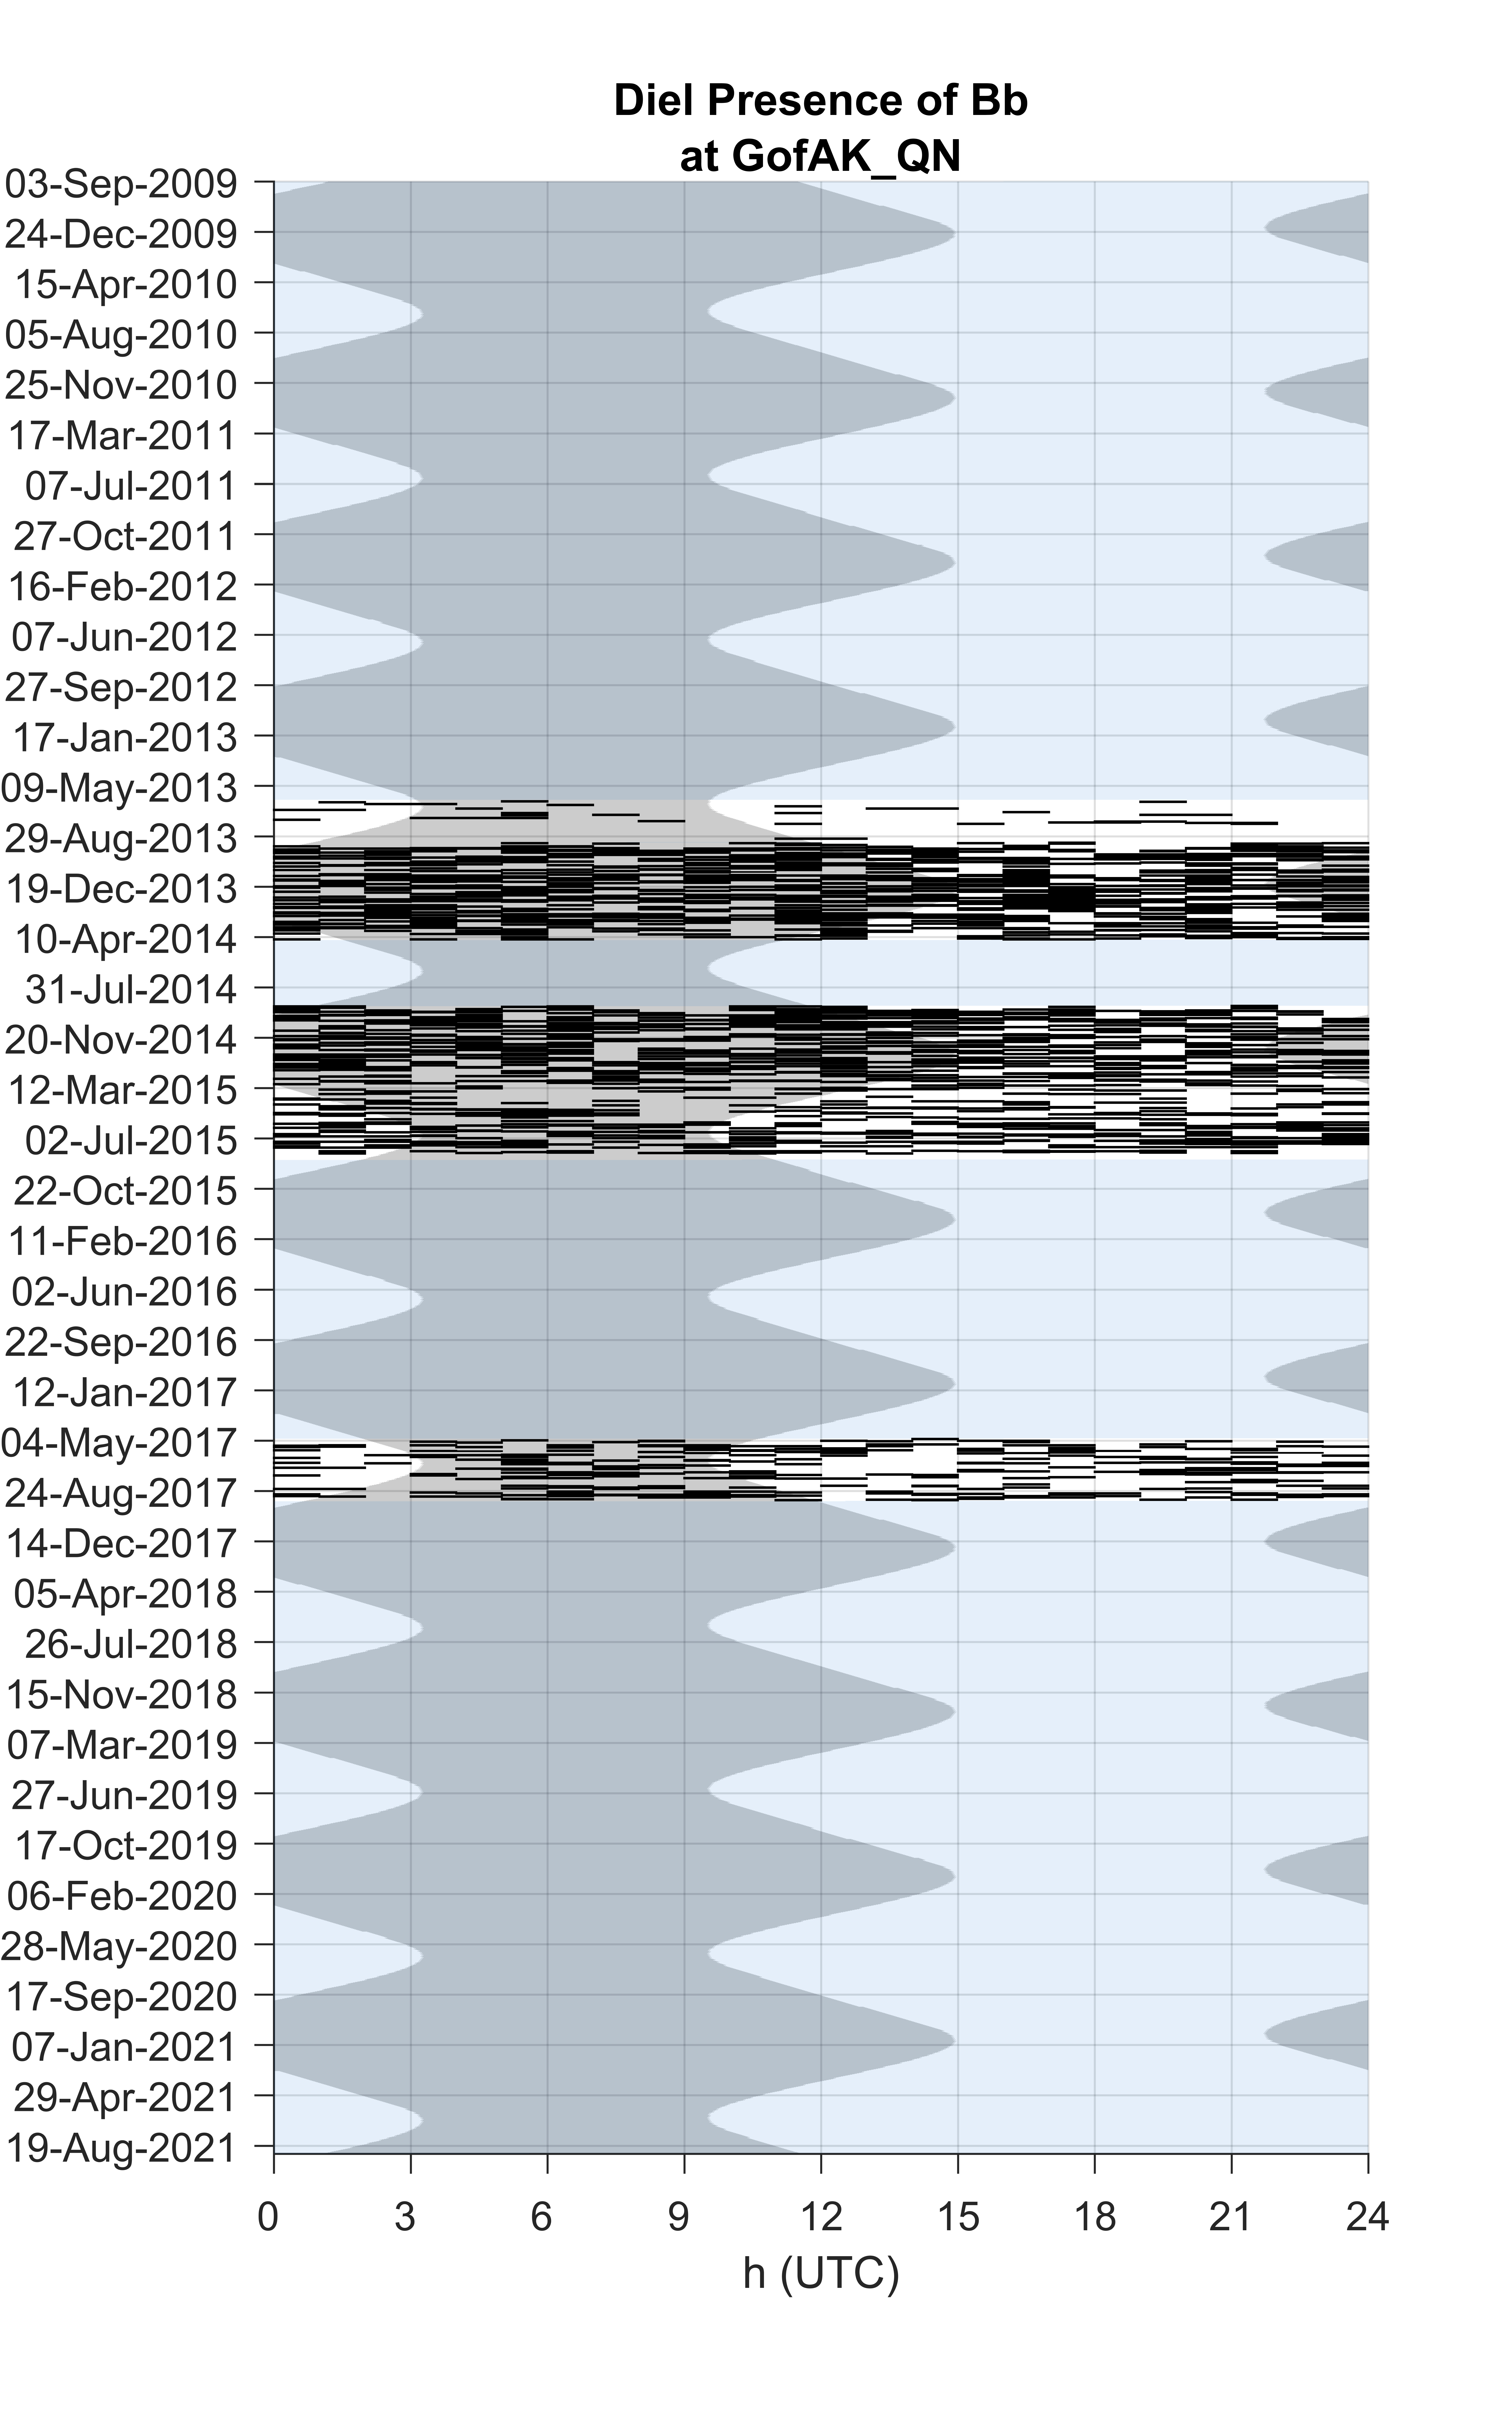


**Figure S4:** Baird’s beaked whale diel presence at GofAK_QN. Hours with acoustic presence (black lines) were plotted for each day with recording effort and are shown over 24 hours (in UTC). Gray areas indicate nighttime periods and white areas indicate daytime periods. Blue shading indicates periods with no recording effort.


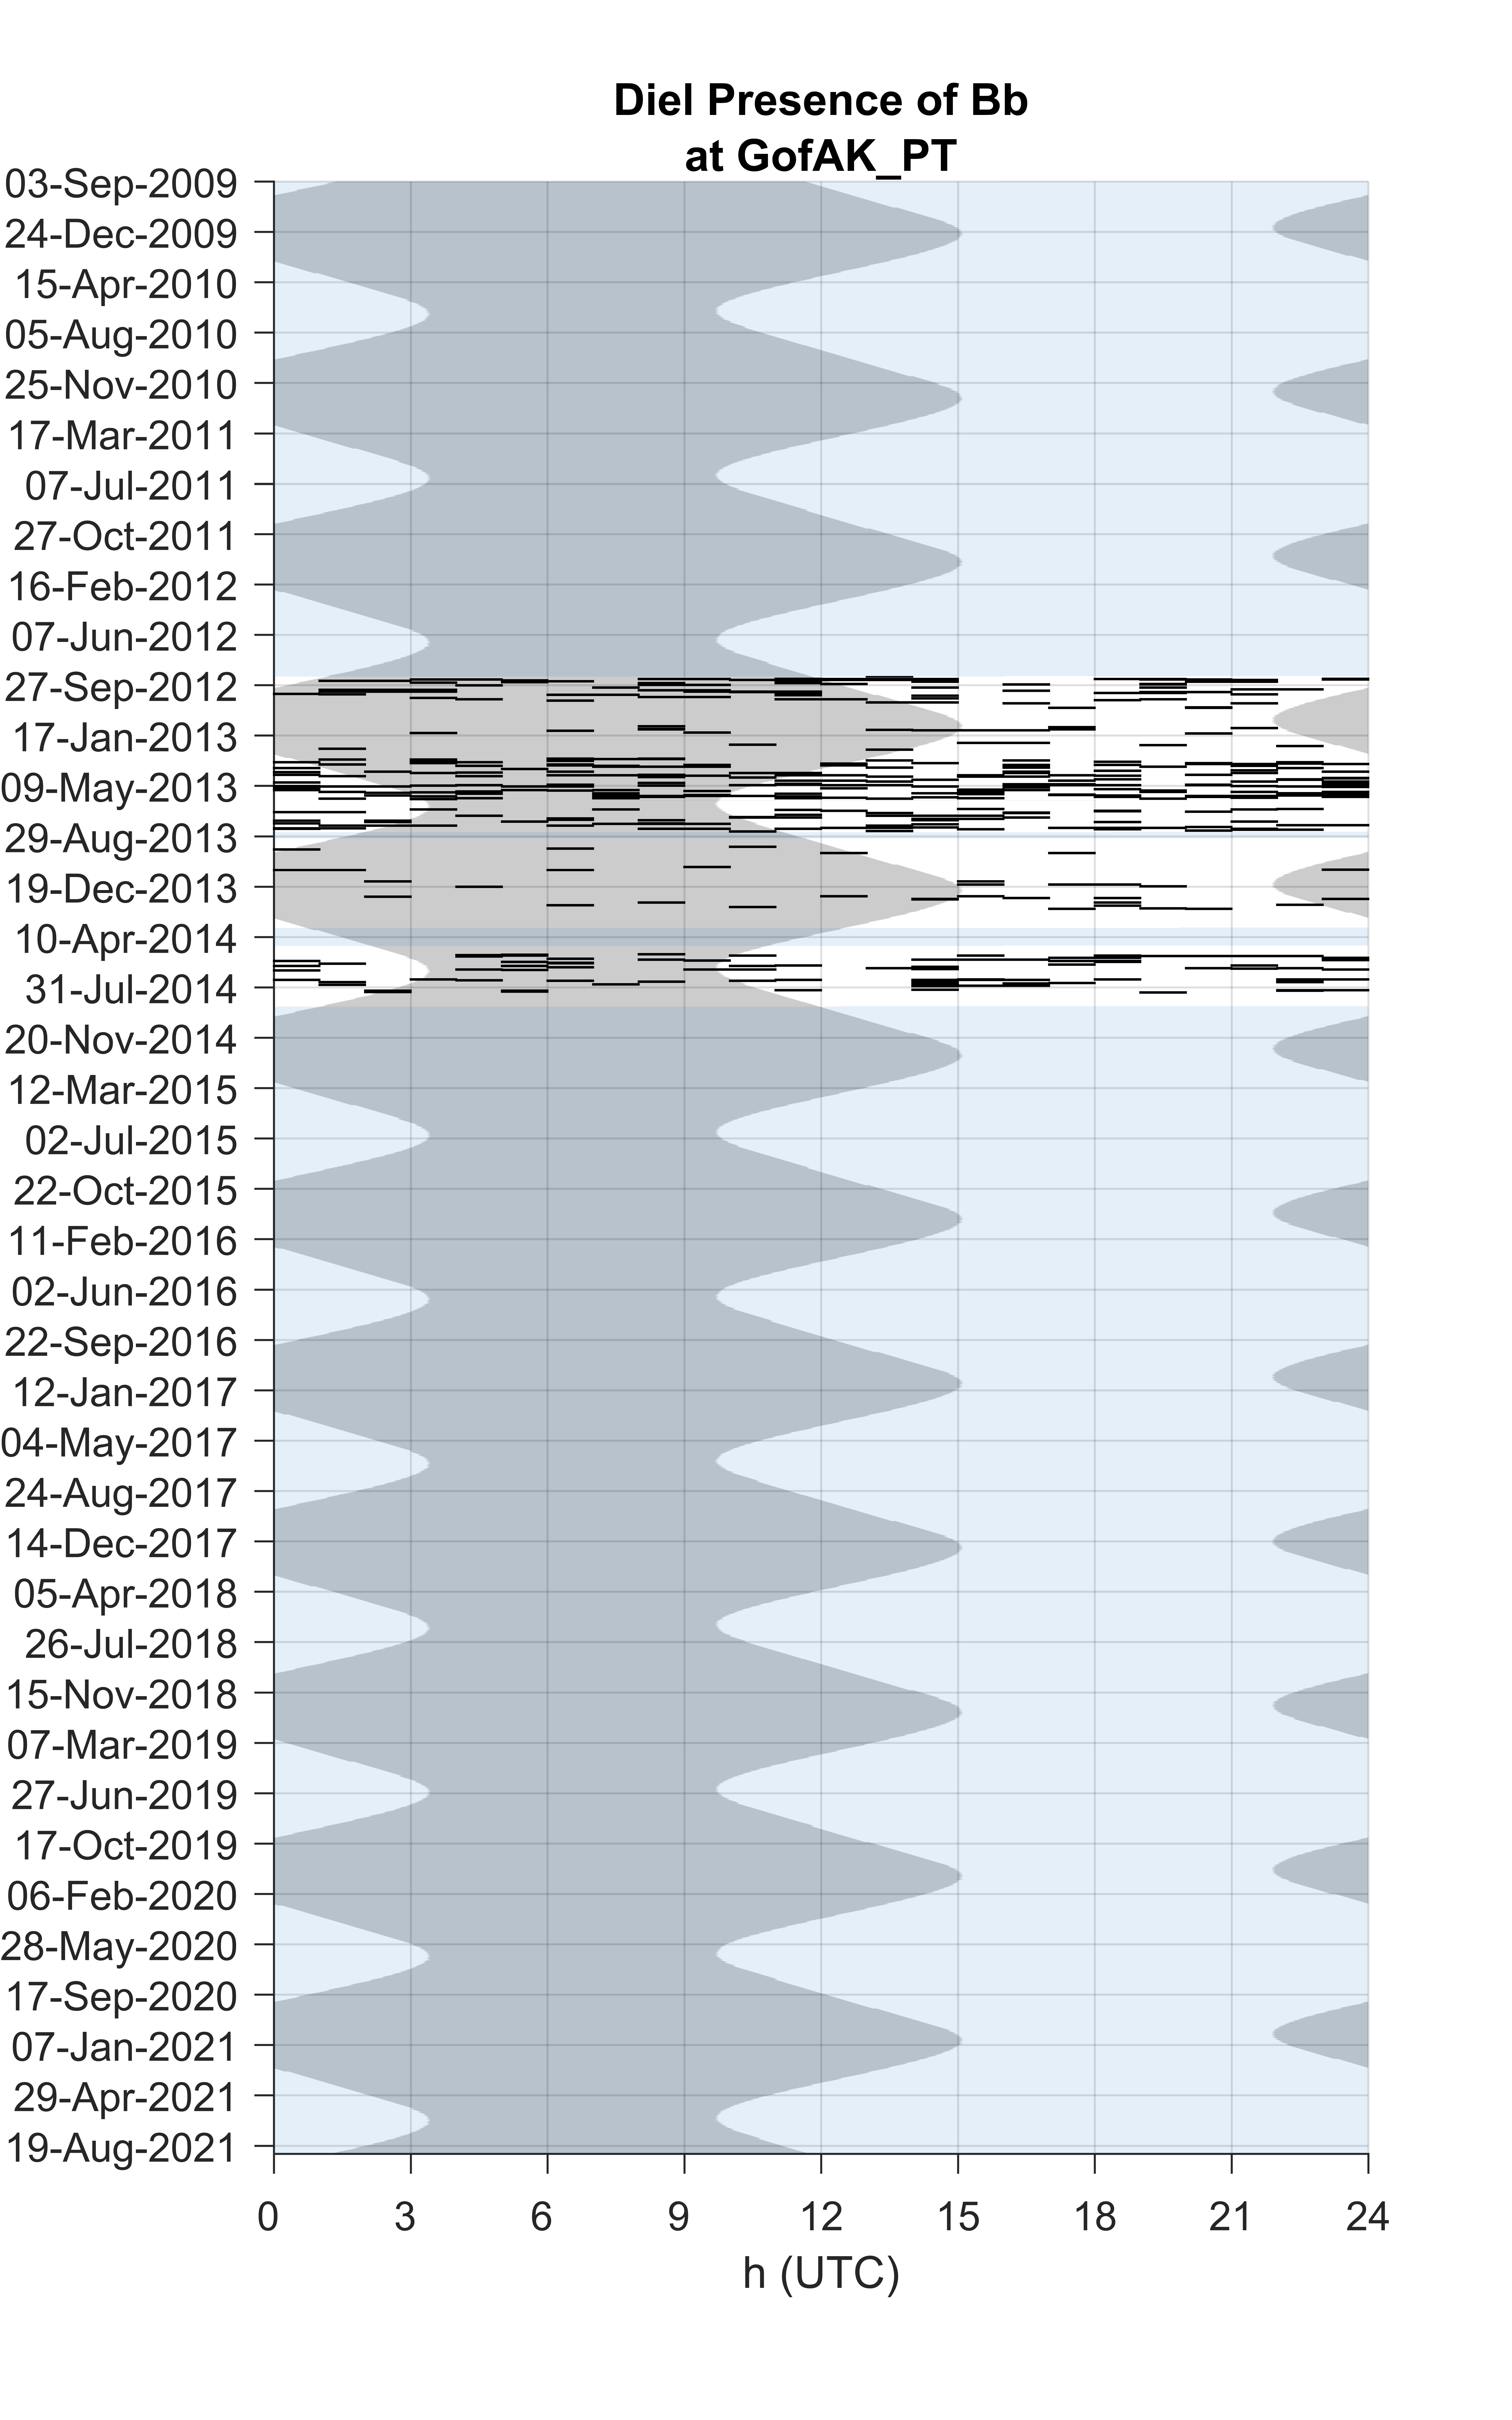


**Figure S5:** Baird’s beaked whale diel presence at GofAK_PT. Hours with acoustic presence (black lines) were plotted for each day with recording effort and are shown over 24 hours (in UTC). Gray areas indicate nighttime periods and white areas indicate daytime periods. Blue shading indicates periods with no recording effort.


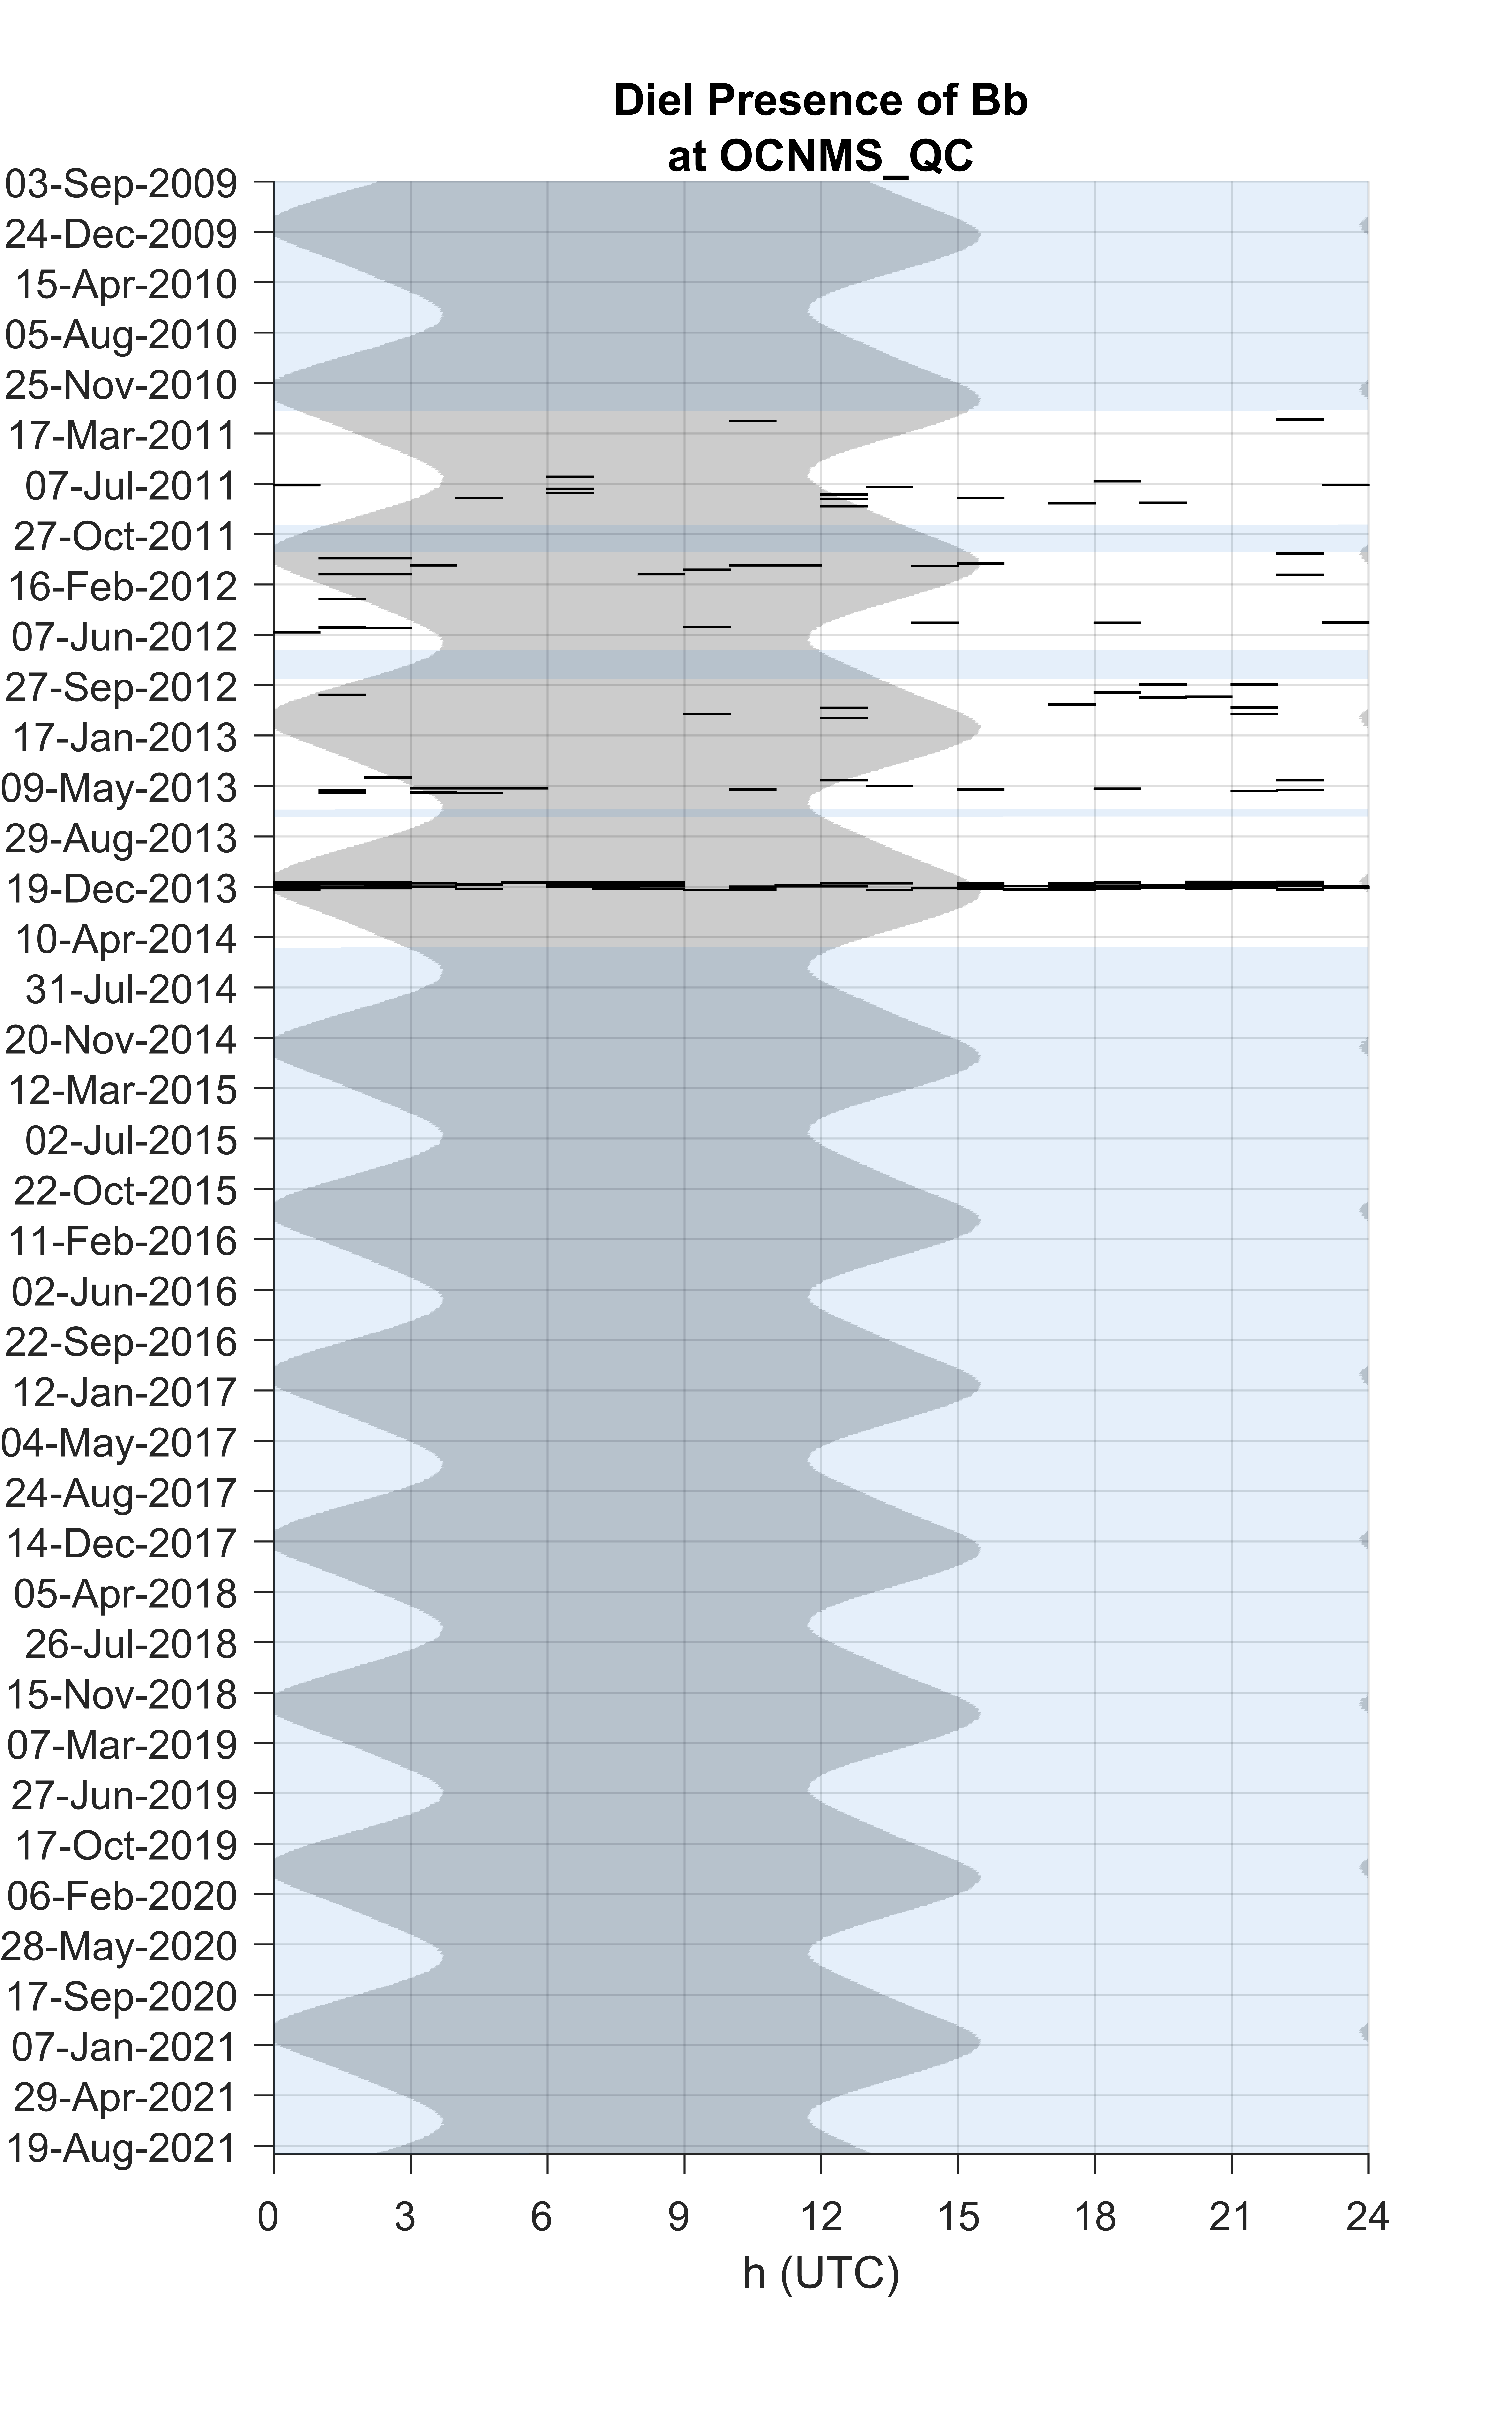


**Figure S6:** Baird’s beaked whale diel presence at OCNMS_QC. Hours with acoustic presence (black lines) were plotted for each day with recording effort and are shown over 24 hours (in UTC). Gray areas indicate nighttime periods and white areas indicate daytime periods. Blue shading indicates periods with no recording effort.


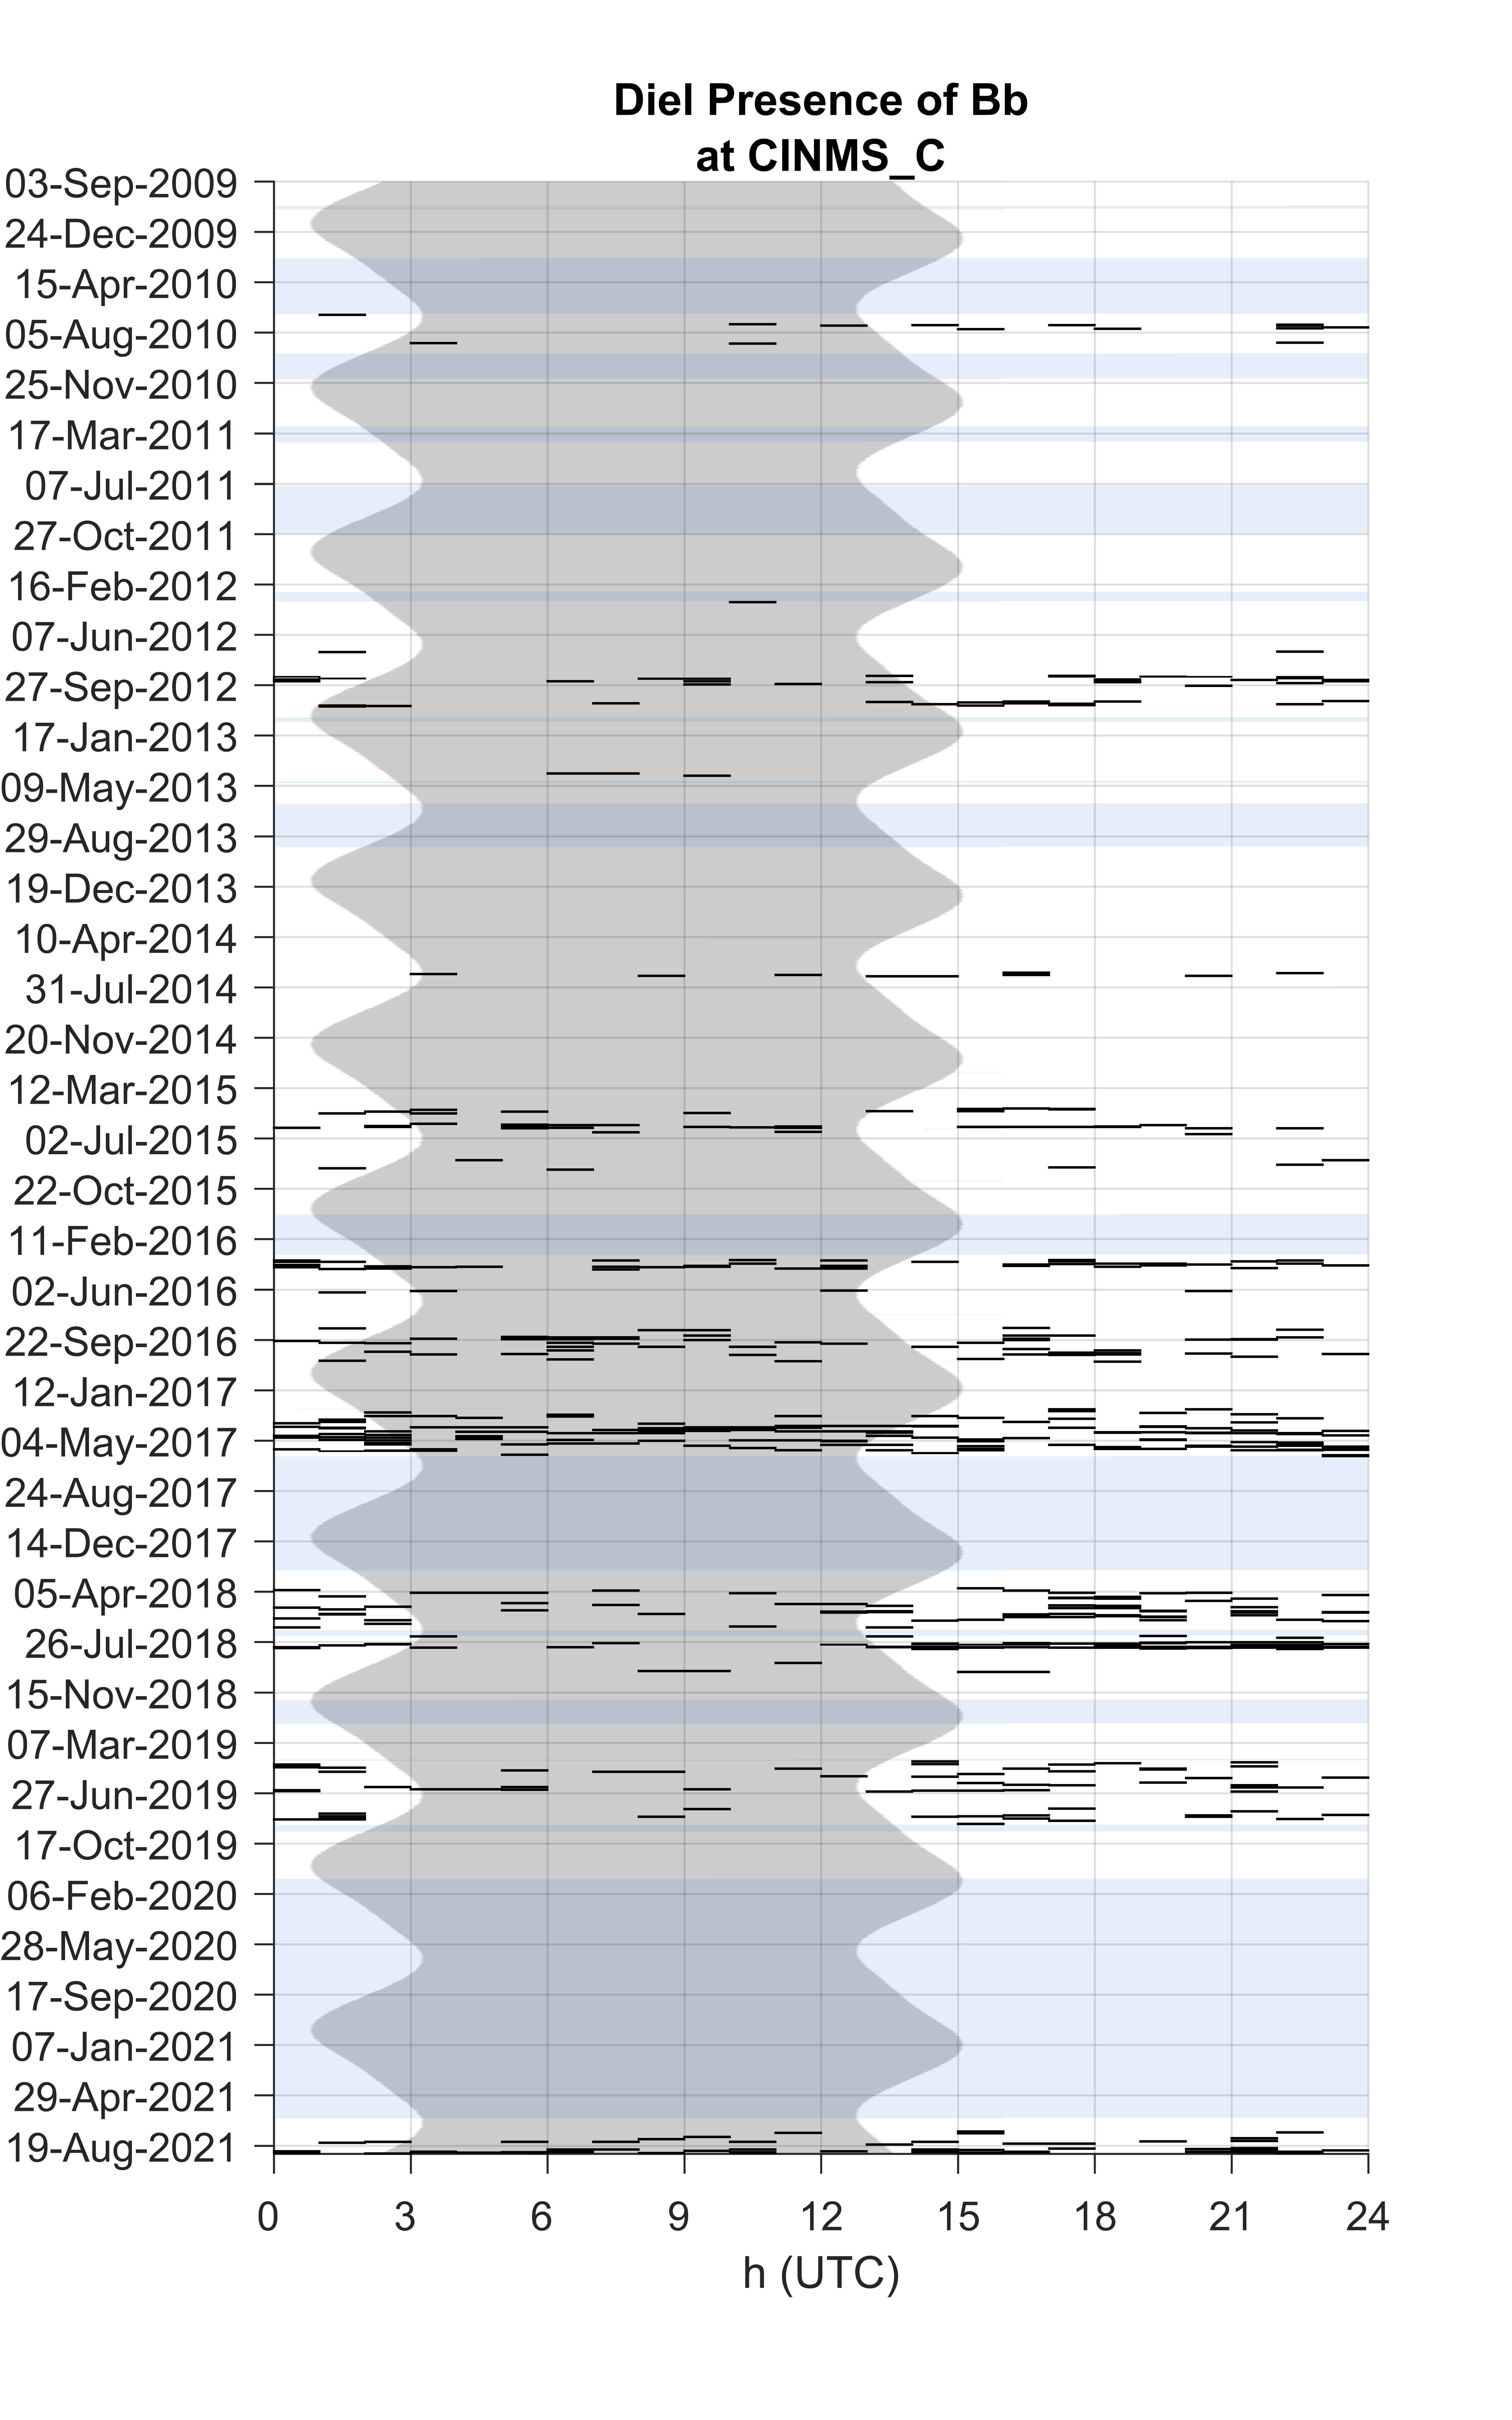


**Figure S7:** Baird’s beaked whale diel presence at CINMS_C. Hours with acoustic presence (black lines) were plotted for each day with recording effort and are shown over 24 hours (in UTC). Gray areas indicate nighttime periods and white areas indicate daytime periods. Blue shading indicates periods with no recording effort.
