# Supplementary material
Source: Research Square preprint supplement (doi:10.21203/rs.3.rs-8981993/v1)
Supplement: Supplementary file 2 [file c39644eac8b021ca55002383.pdf]

## Data Availability Statement

Binned hourly detections and deployment metadata from each recording site are currently available through the private Dryad link. Binned hourly detections contain counts of click-positive minutes per hour for each site where Baird's beaked whale clicks were detected:

[https://urldefense.com/v3/\\_\\_http://h52wvrd.s.r.us-west-2.amazonaws.com/L0/http:\\*2F\\*2Fdatadryad.org\\*2Fshare\\*2FLINK\\_NOT\\_FOR\\_PUBLICATION\\*2F2XVt17ROIGFiVsXH9o1leM\\_s\\_Kjcssxmv2GURFSNKtE/1/0101019c9b1607fe-6ff05b66-6334-410b-874a-152b91354a27-000000/rg9TvocDGjabgNZ8Xw18YRZ7Bkg=468\\_\\_;JSUIJSU!!Mih3wA!CtoPLnpcErdIm35Cyl8vIhKHC1yplZcktTSzPFvW-R1ItQ-obdO2tE17q943b8KS5invb7j5RCVXQj-ZrsLpeQvD5k4\\$](https://urldefense.com/v3/__http://h52wvrd.s.r.us-west-2.amazonaws.com/L0/http:*2F*2Fdatadryad.org*2Fshare*2FLINK_NOT_FOR_PUBLICATION*2F2XVt17ROIGFiVsXH9o1leM_s_Kjcssxmv2GURFSNKtE/1/0101019c9b1607fe-6ff05b66-6334-410b-874a-152b91354a27-000000/rg9TvocDGjabgNZ8Xw18YRZ7Bkg=468__;JSUIJSU!!Mih3wA!CtoPLnpcErdIm35Cyl8vIhKHC1yplZcktTSzPFvW-R1ItQ-obdO2tE17q943b8KS5invb7j5RCVXQj-ZrsLpeQvD5k4$)
